1 **Invariant chain regulates endosomal fusion and maturation**  
2 **through the SNARE Vti1b**

3 Dominik Frei\*<sup>1</sup>, Azzurra Margiotta\*<sup>1</sup>, Marita Borg Distefano<sup>1</sup>,  
4 Mohamed Moulefera<sup>2</sup>, Lennert Janssen<sup>3</sup>, Jacques Thibodeau<sup>2</sup>, Jacques  
5 Neefjes<sup>3</sup> and Oddmund Bakke<sup>1#</sup>

6  
7 \*Equal contribution.

8 <sup>1</sup> Department of molecular Biosciences, University of Oslo, Oslo, Norway.

9 <sup>2</sup> Université de Montréal, Laboratoire d'immunologie moléculaire, Département de  
10 microbiologie, Infectiologie et Immunologie, Montreal, Canada

11 <sup>3</sup> Department of Cell and Chemical Biology, Oncode Institute, Leiden University Medical  
12 Center LUMC, Leiden, The Netherlands

13 # Corresponding author email: oddmund.bakke@ibv.uio.no  
14  
15  
16  
17  
18  
19

20 **Running title:** Invariant chain interacts with Vti1b  
21  
22  
23  
24  
25  
26  
27  
28  
29

30 **Abstract**

31 Invariant chain (Ii) is an important multifunctional player in the regulation of adaptive  
32 immune responses and is responsible for several cellular functions related to MHC I and MHC II  
33 antigen loading and antigen presentation. While regulating endosomal trafficking of MHC II  
34 and other proteins that bind to Ii, this molecule is able to influence the endosomal pathway  
35 delaying the maturation of endosomes to the late endosomal loading compartments. When  
36 expressed in cells Ii is found to increase endosomal size, but the mechanisms for this is not  
37 known. We used RNAi silencing to identify SNARE proteins controlling Ii induced increase  
38 of endosomal size and delay of the endosomal pathway. Ii was found to interact with the  
39 SNARE protein Vti1b. Vti1b localized at the contact sites of fusing Ii positive endosomes and  
40 a tailless Ii was able to relocate Vti1b to the plasma membrane. Furthermore, silencing Vti1b,  
41 abrogated the delay in endosomal maturation induced by Ii expression. In conclusion, Ii  
42 interacts with Vti1b and this interaction is fundamental for Ii-mediated alteration of the  
43 endosomal pathway. We propose that Ii, by interacting with SNAREs, in particular Vti1B in  
44 the biosynthetic pathway of antigen presenting cells, is able to assemble SNARE directed  
45 fusion partners in the early part of the endosomal pathway that lead to a slower endosomal  
46 maturation for efficient antigen processing and antigen loading.

47

48

49 **Keywords:** endosomal fusion/Ii/Vti1b/SNAREs/MHCII

50

51

52

53

54

55

56

57

58

59

60

61

62

63

## 64 **Introduction**

65 Professional antigen presenting cells like dendritic cells and B cells express major  
66 histocompatibility complex class II (MHCII) and associated molecules in the MHC region and  
67 invariant chain (Ii, or CD74) located on a different chromosome (Genuardi and Saunders 1988).  
68 While MHCII is a polymorphic protein, Ii is a non-polymorphic type II transmembrane protein  
69 that forms complexes by self-trimerization and binding to MHC class II (reviewed in  
70 (Landsverk, Bakke, and Gregers 2009). Ii is mainly expressed in antigen presenting cells  
71 (APCs) and has a prominent role sorting associated molecules to the endosomal pathway  
72 (reviewed in (Schroder 2016)). Importantly, Ii, which contains two efficient leucine based  
73 endosomal sorting signals, facilitates the exit of MHC class II from the endoplasmic reticulum  
74 (ER) in antigen-presenting cells and mediates rapid transport of the MHCII/Ii complex to the  
75 endosomal pathway where the antigen is efficiently loaded (Bremnes et al. 1994; Bakke and  
76 Dobberstein 1990; Elliott et al. 1994; Bikoff et al. 1993; Neefjes and Ploegh 1992). In addition,  
77 Ii delayed transport from Rab5 positive early endosomes (EE) to late Rab7a positive  
78 endosomes (LE) (Gorvel et al. 1995). Ii also induced fusion of early endosomes creating  
79 enlarged endosomes (Pieters, Bakke, and Dobberstein 1993; Romagnoli et al. 1993). These  
80 enlarged endosomes were able to mature normally, however, with a prolonged residence time  
81 in EE (presence of EEA1 and Rab5) before the endosomes switched to late, acidic Rab7a and  
82 Lamp1 positive multivesicular endosomes and lysosomes (Stang and Bakke 1997; Landsverk  
83 et al. 2011).

84 Most membrane fusion events in the cell require SNARE (soluble N-ethylmaleimide-  
85 sensitive-factor (NSF) attachment protein (SNAP) receptor) proteins (reviewed in (Jahn and  
86 Scheller 2006)). All SNAREs share the conserved SNARE motif of 60-70 amino acids  
87 (Weimbs et al. 1997) and generally contain a transmembrane domains; however, some are  
88 anchored to membranes by lipid modifications. There are several types of SNARE domains:  
89 R-SNAREs contribute an arginine residue to the binding layer of the assembled complex, while  
90 Q-SNAREs have conserved glutamine residues (Fasshauer et al. 1998). Q-SNAREs are further  
91 subdivided into Qa-, Qb- and Qc-SNAREs depending on their position in the complex. One  
92 SNARE domain of each class is required to form the complex. The formation of this complex  
93 provides the driving power necessary for membrane fusion.

94 Interestingly, although PI3K inhibitors block homotypic fusion of early endosomes (Jones and  
95 Clague 1995; Powis et al. 1994), this is not the case for Ii-positive endosomes (Nordeng et al.  
96 2002). This indicates that the Ii mediated fusion mechanism differ from the standard early  
97 endosomal fusion machinery. The Ii induced fusion of endosomes was, however, inhibited by  
98 NEM suggesting that SNARE molecules were involved in this process. After failed rounds of  
99 searching for Ii associated proteins explaining the trafficking effects by two-hybrid screens and  
100 coimmunoprecipitations experiments, we set out to test the involvement of every individual  
101 SNARE protein in the Ii specific endosomal fusion events.

102 Our siRNA screen and subsequent verification identified the Q-SNARE Vti1b as a  
103 plausible candidate. Vti1b depletion reduced Ii-induced endosomal size, indicating a functional  
104 role in this process. This was further substantiated by a co-isolation of Vti1b with Ii. Vti1b was  
105 found enriched at contact sites between Ii-positive endosomes and present at the fusion pore.  
106 As a further proof, depletion of Vti1b abrogated the effect of Ii-induced delay in endosomal  
107 maturation. These data suggest that Vti1b is an essential element in the regulation of the  
108 endosomal pathway by Ii.

109

## 110 **Results**

### 111 **Ii regulates endosomal maturation in antigen presenting cells.**

112 In our earlier studies the Ii induced endosomal maturation delay was measured as a  
113 delayed entry from Rab5 positive to Rab7 positive endosomes (Gorvel et al. 1995) or a  
114 prolonged EE phase (Landsverk et al. 2011) in non-antigen presenting cells without the MHC  
115 domain molecules. If Ii has a similar regulatory role on endosomal maturation in cells  
116 containing the full MHC II antigen presenting machinery removal of Ii should speed up  
117 endosomal maturation. To test for this, we generated, using CRISPR-Cas9, human antigen-  
118 presenting cell lines lacking Ii (Ii KO) (see M&M). We first followed progression of the  
119 fluorescent fluid phase marker 8-hydroxypyrene-1,3,6-trisulphonate (HPTS) in human  
120 lymphoblast Raji cells either expressing the Cas9 enzyme (control) or Ii KO by measuring the  
121 time for a HPTS to colocalize with acidic lysotracker red (LTR) late endosomes. In Ii KO cells,  
122 fluid phase marker HPTS reached lysotracker red (LTR) late endosomes faster than in the  
123 control cells (Figure 1A). 1 hour after addition of HPTS the colocalization with LTR was 45%  
124 in the Ii KO cells while in the corresponding control cells, this was 30% indicating that the KO  
125 of Ii in the Raji cells causes a significant faster endosomal maturation. Meljuso cells naturally  
126 express Ii and MHCII and are a popular model system for studying antigen presentation. HPTS

127 colocalization with LTR was followed over time in control and Ii KO MeJuSo cells for up to  
128 200 min (Fig 1B). At this time point, in the Ii KO cells about 50% of LTR colocalized with  
129 HPTS, compared to only 30% in control cells. The entry of HPTS into late endosomal  
130 compartments was again significantly faster in Ii KO cells. This suggests that Ii regulates  
131 endosomal maturation not only in model fibroblast-like cell lines transfected with Ii, but also  
132 in antigen presenting cells that contain the full MHCII-related antigen processing and  
133 presentation machinery.

134

### 135 **Vti1b is involved in Ii-mediated endosome enlargement.**

136 When Ii was expressed in non-antigen presenting cells, the size of the endosomal  
137 compartments strongly increased (Pieters, Bakke, and Dobberstein 1993; Romagnoli et al.  
138 1993). In fact, there was a direct correlation between the size increase and Ii-expression levels  
139 (Nordeng et al. 2002). Both the delayed maturation and the endosomal expansion was  
140 dependent on Ii trimerization and suggested that these effects were caused by the same  
141 mechanism (Nordeng et al. 2002; Gregers et al. 2003). NEM is a chemical compound that  
142 block amongst others SNARE proteins. Since NEM inhibited Ii driven effects on the  
143 endosomal pathway, we proposed a contribution of SNAREs (Nordeng et al. 2002).

144 To test for SNAREs involved in Ii-mediated endosome enlargement, we silenced all  
145 individual SNAREs in the M1 fibroblast cell line, stably transfected with Ii under the control  
146 of a heavy-metal inducible promoter (M1 pMep4-Ii, (Nordeng et al. 2002)). The M1 wild type  
147 cell line is negative for Ii and the MHCII proteins but the cell line has been employed  
148 extensively to study endosomal dynamics and antigen presentation by transfecting in immune  
149 genes (Roche et al. 1993; Stang and Bakke 1997; Skjeldal et al. 2012; Sand et al. 2014; Haugen  
150 et al. 2017). Ii transport to Ii positive endosomes was visualized by adding fluorescently tagged  
151 antibody recognizing the extracellular/luminal domain of Ii, and the size of Ii-positive  
152 endosomes was analysed by confocal microscopy (Figure 2A).

153 As a test for our screening system we employed some of the known inhibitors of early  
154 endosome fusion. The MAP kinase inhibitor SB203580 (Cuenda et al. 1995) was used to block  
155 Rab5 activation and Wortmannin to inhibit PI3K activity (Wymann et al. 1996). As shown  
156 earlier (Nordeng et al. 2002), wortmannin did not inhibit formation of enlarged endosomes (Fig  
157 2B). MAP kinase activity was also not essential since SB203580 could not stop the formation  
158 of the enlarged endosomes (Fig 2B). However, N-ethylmaleimide (NEM), a general inhibitor

159 of SNARE function, significantly reduced Ii-mediated endosome enlargement by about 50%  
160 (Fig 2B), in line with earlier results from cell free studies (Nordeng et al. 2002).

161 To screen for specific SNARE proteins involved in Ii-mediated endosome enlargement,  
162 inducible M1 pMep4-Ii cells were transfected with pools of siRNAs (four oligos per target  
163 gene) targeting 40 individual human SNAREs. Three days post-transfection, cells were  
164 analysed by 3D confocal microscopy to determine the degree of endosome enlargement upon  
165 Ii expression. This screen showed that silencing Vti1b counteracted the Ii induced endosome  
166 enlargement by 50%. Validation with individual siRNAs for Vti1b showed an even stronger  
167 inhibitory effect for two out of the four siRNAs (Fig 2C). Western blot analyses of cells  
168 transfected with these siRNAs confirmed a significantly reduced level of the Vti1b target  
169 protein (Fig 2D-E).

170 These experiments suggest that depletion of Vti1b inhibits the Ii induced formation of enlarged  
171 endosomes.

172

### 173 **Silencing of Vti1b specifically reduces Ii-mediated endosome enlargement**

174 Given the effect of Vti1b in the regulation of the size of Ii-positive endosomes, we  
175 evaluated whether the depletion of this SNARE also interfered with endosomes enlarged by  
176 other means than expression of Ii. A well-known method for expanded early endosomes is to  
177 express the active mutant of Rab5 (Rab5Q79L) (Stenmark et al. 1994; Wegner et al. 2010). M1  
178 pMep4-Ii cells were transfected with control siRNA or siRNA targeting Vti1b and  
179 subsequently either treated with CdCl<sub>2</sub> to induce Ii expression, (inducible metallothioneine  
180 promotor) (Fig 3A, top row) or transfected with EGFP-Rab5Q79L (Fig 3A, bottom row).  
181 Images were acquired and the size of Ii- or Rab5Q79L-positive endosomes was determined  
182 (Fig 3B). Silencing of Vti1b with either of the two siRNAs reduced Ii-mediated endosome  
183 expansion by approximately 70% (Fig 3B). On the other hand, Vti1b depletion did not affect  
184 the size of Rab5Q79L-positive endosomes, showing that Vti1b is not essential for endosome  
185 enlargement of early endosomes induced by active Rab5. To study this process further we  
186 quantified the number of endosomes per cell in the above experiment and observed that the  
187 silencing of Vti1b significantly increased the number of endosomes after Ii expression (Fig  
188 3C). On the other hand, silencing of Vti1b had no effect on the number of endosomes after  
189 overexpression of Rab5Q79L (Fig 3C) The above measurements suggest that Vti1b effect is  
190 not a general requirement for enlarging early endosomes, but more specific for the Ii induced  
191 endosomal expansion.

192

### 193 **Vti1b localized to contact sites between Ii-positive endosomes during their fusion**

194         Given the well documented role of SNARE proteins in membrane fusion, we decided  
195 to evaluate the localization of Vti1b in M1 pMep4-Ii cells transfected with Ii and Vti1b-  
196 mCitrine. Interestingly, cells expressing Vti1b-mCitrine showed that this SNARE protein is  
197 localized at the contact sites between Ii-positive endosomes (Fig 4A, Movie EV1, see also 4B  
198 top row for fixed cells). In particular, Vti1b-mCitrine was detected directly at the opening  
199 fusion pore between two Ii-positive endosomes (Fig 4A, Movie EV1). Moreover, Vti1b-  
200 mCitrine was localized in intense microdomains on endosomes with these domains often found  
201 at the contact sites between two Ii-positive endosomes. As a control we used again mCherry-  
202 Rab5Q79L induced enlarged endosomes (Fig 4B bottom row). Quantification of the frequency  
203 with which Vti1b localized at the contact sites showed that Vti1b accumulated at about 80% of  
204 the contact sites between Ii-positive endosomes whereas Vti1b localized to this contact zone in  
205 40% of the recorded interaction sites between Rab5Q79L-positive endosomes (Fig 4C). This  
206 shows that Vti1b is recruited more often to the contact site of fusing Ii-positive endosomes as  
207 compared to Rab5Q79L-positive endosomes (Fig 4C). Furthermore, we also evaluated the  
208 localization of endogenous Vti1b in M1 pMep4-Ii cells where Ii has been induced and  
209 endosomes were enlarged (Fig 4D). Similarly, to the transfected Vti1b-mCitrine fusion protein,  
210 immunofluorescence of endogenous Vti1b showed its localization at the contact sites of Ii-  
211 positive endosomes (Fig 4D). This was also studied in the Meljuso cells, and again Vti1b  
212 localized to contact sites between Ii-positive endosomes (Fig 4E), indicating that Vti1b  
213 associated with invariant chain at endosomal contact sites also in professional antigen  
214 presenting cells. In Meljuso cells the endosomes were not enlarged showing that Vti1b  
215 localization was not restricted to Ii induced enlarged endosomes.

216

### 217 **Vti1b interacts with Ii**

218         As Vti1b has a role in the regulation of the Ii-mediated endosomal enlargement and  
219 colocalize with Ii, we tested, whether this SNARE could interact with Ii. Firstly, we transfected  
220 either EGFP (as a negative control) or Vti1b-mCitrine into M1 pMep4-Ii cells. The expression  
221 of Ii was induced by CdCl<sub>2</sub> treatment overnight and then we performed a co-IP experiment  
222 using anti-GFP nanobodies. We evaluated the presence of Ii in the eluates by Western blot (Fig  
223 5A). We observed a band for Ii after immunoprecipitation of Vti1b-mCitrine with anti-GFP  
224 antibodies but not for the control EGFP (Fig 5A) showing that Vti1b interacts with Ii. In order  
225 to further elucidate the interaction between Vti1b and Ii, we transfected Vti1b-mCitrine and

226 His-tagged Ii wt or Ii lacking the cytosolic tail (Ii $\Delta$ 27) in HeLa cells. As a negative control we  
227 used cells co-transfected with EGFP and Ii wt. Then we performed a co-immunoprecipitation  
228 assay with anti-GFP nanobodies (Fig 5B). Interestingly, Vti1b-mCitrine interacted with full-  
229 length Ii but also with Ii $\Delta$ 27 (Fig 5B), showing that the cytoplasmic tail of Ii is dispensable for  
230 binding to Vti1b.

231

### 232 **Tailless Invariant chain relocates Vti1b to the plasma membrane**

233 Vti1b contains a very short luminal domain (3 amino acids) and a long cytoplasmic tail  
234 (Brunger 2005) whereas Ii has a short (30 amino acids) cytoplasmic domain and a long luminal  
235 domain (Schroder 2016). Ii without a cytoplasmic tail is known to target invariant chain to the  
236 plasma membrane (PM) (Bakke and Dobberstein 1990).

237 To characterize the localization of these two associated proteins, we expressed the  
238 tailless Ii with a hexahistidine tag, (His-Ii  $\Delta$ 27) and Vti1b-mCitrine in HeLa cells and as control  
239 the same set up with full length Ii. As shown in Figure 6, Vti1b with full-length Ii was located  
240 in intracellular vesicles including endosomes positive for Ii. However, when Vti1b was  
241 expressed with Ii  $\Delta$ 27, a large fraction of Vti1b colocalized with Ii  $\Delta$ 27 at the PM. Since Vti1b  
242 was found to bind both Ii wild type and Ii  $\Delta$ 27, this suggest that these two molecules are  
243 associated in the biosynthetic pathway and that Vti1b is actively sorted by Ii to the endosomal  
244 pathway.

245

### 246 **The influence of Ii KO on Vti1b distribution in antigen presenting cells.**

247 In the intracellular trafficking experiments above we transfected Ii and mutants into  
248 cells lacking MHCII and associated genes (M1 and Hela cells). Meljuso cells, however, express  
249 endogenously the proteins involved in MHCII loading including MHCII, Ii and HLA-DM  
250 (Elliott and Neefjes 2006). MHCII may change the activities of Ii on endosomal maturation  
251 and expansion. To test this, we transfected Vti1b-mCitrine into Meljuso Ii KO and Meljuso wt  
252 cells followed by fixation and labelling with anti-CI-M6PR antibody that labels trans-Golgi  
253 network (TGN) and endosomes (Fig 7). Interestingly, Vti1b-mCitrine colocalized more with  
254 CI-M6PR in the Ii KO cells as compared with the wild type (Fig 7A, for quantitation, Figure  
255 7B). We also evaluated the number of vesicles positive for Vti1b-mCitrine which was  
256 drastically reduced with about 40 vesicles/cell in the Ii KO cells as compared an average of  
257 240 vesicles/cell for the wild type (Fig 7C). The volume of the CI-M6PR positive structures,  
258 in the Ii KO and wild type Meljuso cells were not significantly different (Fig 7D). As shown  
259 in Figure 7 we were able to rescue the phenotype by transfecting cDNA for Ii into the KO cells



260 indicating that the altered intracellular distribution of Vti1b is indeed caused by the Ii KO and  
261 not by an off target effect.

262 The CI-M6PR localizes in the trans-Golgi, plasma membrane and the late endosomal  
263 pathway (Hille-Rehfeld 1995). To firmly establish the localization of Vti1b in the MeljuSo Ii  
264 KO, we also colocalized Vti1b with the Golgi resident protein giantin (Linstedt and Hauri  
265 1993) and with TGN46 which mainly resides in the TGN (Prescott et al. 1997). As shown in  
266 Figure 8 more intense colocalization with both of these Golgi proteins was observed in the Ii  
267 KO cells.

268 Vti1b has been reported to be in a complex with other endosomal SNARE proteins  
269 (Antonin et al. 2000; Wade et al. 2001; Pryor et al. 2004). However, the colocalization of CI-  
270 M6PR with fusion proteins of Vamp7, Stx8 and VAMP8 was not altered in the Ii KO cells (Fig  
271 EV1), indicating that the effect of Ii is not general for endosomal SNAREs and possibly specific  
272 for Vti1b.

273

#### 274 **Vti1b is expressed in APCs and its protein levels are not affected by Ii expression**

275 Given the important role of Ii in professional APCs and in antigen presentation  
276 (reviewed in (Schroder 2016)), we determined Vti1b protein level in APCs and other cell types.  
277 The expression levels of Vti1b in monocyte-derived dendritic cells, EBV immortalized B cells,  
278 the melanoma cell line MelJuSo, HeLa, Raji, M1 and Neuro2A cells was analysed by Western  
279 blot (Fig EV2A). Vti1b was widely expressed (Fig EV2A). To test whether Ii affects the  
280 expression levels of this SNARE protein, we analyzed Raji B cells (Fig EV2B,C) or the  
281 melanoma cell line MelJuSo (Fig EV2D,E) both wt and Ii KO. In both cell lines the expression  
282 of Vti1b was not affected by Ii expression. Similarly, high levels of Ii expression in M1 pMep4-  
283 Ii cells after induction with CdCl<sub>2</sub> (Fig EV2F) did also not affect Vti1b expression (Fig EV2).  
284 Ii expression does not affect endogenous Vti1b expression.

285

#### 286 **Knockdown of Vti1b does not affect lysosome dynamics and expression of endosomal 287 marker proteins**

288 Vti1b is reported to be a SNARE mainly involved in the late steps of endocytosis  
289 (Antonin et al. 2000; Pryor et al. 2004; Luzio et al. 2009; Kreykenbohm et al. 2002) and we  
290 wondered whether Vti1b knock down could affect the expression of other proteins relevant in  
291 the endosomal pathway (Rab7a, Rab7b, Rab9, LAMP1 and EEA1, see Fig EV3). Western blot  
292 analysis revealed that the expression level of these endosomal proteins was unaltered after  
293 Vti1b depletion (Fig EV3B-F). In addition, we were also unable to detect significant alterations

294 in the endosomal system in the Vti1b depleted M1 cells, even when Ii was expressed (Movie  
295 EV1).

296

### 297 **Silencing of Vti1b abrogates the endosomal maturation delay induced by Ii**

298 Ii expression delays endosomal maturation from early Rab5 positive endosomes to late  
299 Rab7 positive endosomes (Gorvel et al. 1995; Landsverk et al. 2011) which correlates to Ii  
300 induced endosomal enlargement (Nordeng et al. 2002; Gregers et al. 2003). It would then be  
301 imperative that depletion of Vti1b would counteract the Ii induced endosomal maturation delay.  
302 The rate of endosomal maturation was determined by colocalization of the fluorescent fluid  
303 phase marker dextran-AlexaFluor 488 with Lysotracker Deep Red as a function of time in live  
304 cells. When we performed the assay in M1 pMep4-Ii cells without adding CdCl<sub>2</sub> and thus not  
305 expressing Ii, 65% of dextran was localizing with Lysotracker Deep Red after 1 h. When  
306 expression of Ii was induced by CdCl<sub>2</sub>, entry of dextran was strongly delayed with only 35%  
307 overlap after one hour (Fig 9). This again involved Vti1b as silencing of Vti1b before induction  
308 of Ii expression restored the Ii delayed rate of endosomal transport and fusion to close to that  
309 of the control cells not expressing Ii. This suggests that Vti1b is essential for the Ii induced  
310 delay in endosomal maturation.

311

312

### 313 **Discussion**

314 Invariant chain associates with MHCII and the first function to be described was its  
315 ability to sort MHCII molecules to intracellular endosomal compartments. It was later shown  
316 that Ii actively sort other molecules to the endosomal pathway such as CD1 and MHCI, both  
317 molecules that participates in antigen presentation to specific T cells (for reviews see (Neefjes  
318 et al. 2011) and (Schroder 2016)). Other striking trafficking features of Ii is that, when  
319 expressed in non-antigen-presenting cells, it delays endosomal maturation (Gorvel et al. 1995;  
320 Landsverk et al. 2011). In addition, Ii has “fusogenic” properties as expression in cells lead to  
321 homotypic fusion of early endosomes (Nordeng et al. 2002; Romagnoli et al. 1993; Stang and  
322 Bakke 1997). This had led to the hypothesis that Ii is a key immunological molecule that is  
323 essential for creating “immunoendosomes” suitable for slowly processing endosomal contents  
324 for antigen loading (Neefjes et al. 2011). The MHCII-positive multivesicular late endosomal  
325 compartment in antigen-presenting cells (Peters et al. 1995) should then be a typical  
326 immunoendosome. The idea that Ii may delay endosomal maturation was until now only seen

327 in fibroblast cells when transfected with Ii (Gorvel et al. 1995) which may fundamentally differ  
328 from professional antigen presenting cells. Here we show that KO of Ii in the antigen-  
329 presenting Raji B cell line and the MHCII positive Meljuso cells also affects endosomal  
330 maturation, in this case the Ii KO results in faster maturation. No direct correlation has been  
331 shown between the Ii induced formation of enlarged early endosomes and Ii induced maturation  
332 delay, however, mutations of the charged residues from negative to positive in the cytosolic  
333 tail of Ii has been found to abrogate both effects without altering the leucine sorting signals  
334 (Gregers et al. 2003; Nordeng et al. 2002) indicating that both effects are caused by similar  
335 mechanisms.

336 How would Ii manipulate the endosomal pathway? We have shown by NMR studies  
337 that the cytosolic tails of invariant chain could interact in trans and possibly interact in  
338 homotypic fusion (Motta et al. 1997). Ii has a short cytosolic tail of 30 aa, which would prevent  
339 it as acting as a genuine SNARE. It is thus more likely that other molecules are recruited to Ii  
340 to manipulate the endosomal pathway. We showed earlier that EEA1 or Rab5 were not essential  
341 for the Ii induced fusion and resulting enlargement of endosomes (Nordeng et al. 2002).  
342 However, the chemical compound NEM, that inhibits the SNARE function blocked fusion and  
343 formation of Ii induced enlarged endosomes (Nordeng et al. 2002), bringing our attention to  
344 SNAREs as essential for the process. We confirmed this data in the system that we used for the  
345 screen (Fig. 2B).

346 Based on these data we performed an RNAi screen to search for specific SNAREs that  
347 were essential for the Ii induced endosomal fusion. In our RNAi screen, we found that silencing  
348 of the Qb SNARE, Vti1b strongly decreased Ii-induced endosomal size (Fig 2C-E).  
349 Interestingly, although Vti1b has a major role in the fusion of late endosomes, it has not been  
350 implicated in the fusion of early endosomes (Luzio et al. 2009; Pryor et al. 2004; Kreykenbohm  
351 et al. 2002; Antonin et al. 2000). This shows that Ii employs a SNARE complex that is  
352 independent of the canonical early endosomal fusion machinery and can act in parallel.

353 In support of this, enlargement of endosomes induced by the expression of the constitutively  
354 active mutant of Rab5, Rab5Q79L, was not affected by Vti1b silencing (Fig 3). Interestingly,  
355 the reduction of Ii-positive endosomal size was accompanied by an increase in the number of  
356 Ii-positive endosomes, corroborating the hypothesis that Ii-induced enlargement of endosomes  
357 is due to an increase in endosomal fusion rather than reduced fission.

358 In support of this data, we demonstrated that both overexpressed and endogenous Vti1b  
359 was localized at the contact sites of Ii-positive endosomes in different cell lines and especially  
360 that Vti1b was directly at the opening fusion pore of fusing endosomes (Fig. 4; Movie EV1).

361 Strikingly, the effect was highly pronounced for the Ii-enlarged endosomes and Vti1b was  
362 detected at 80% of the endosome-endosome contact points. Using another method that enlarges  
363 endosomes, the constitutive active Rab5 (Rab5Q79L) (Wegner et al. 2010), Vti1b was only  
364 seen in 40% of the contact sites. This indicates that Vti1b is located at the site where fusion is  
365 happening and invariant chain expression then affects the location of Vti1b.  
366 Immunoprecipitation studies showed that Vti1b binds to Ii, directly or indirectly and this  
367 interaction may be the reason for the presence of Vti1b in the contact zone between Ii-positive  
368 endosomes. The fact that tailless Ii (Ii  $\Delta$ 27) also co-isolated Vti1b, suggests that the interaction  
369 is via their transmembrane domains or indirect.

370 The antigen presenting cell line Meljuso expresses Ii, and we find that the distribution  
371 of Vti1b was shifted perinuclear in the Ii KO cells showing an increased colocalization with  
372 CI-M6PR, Giantin and TGN46 (Fig. 7,8), which all are located mainly at the Golgi and  
373 correspondingly fewer Vti1b-positive vesicles were detected in Ii KO cells (Fig. 7). This  
374 suggest that Ii in wt Meljuso cells is involved in transport of Vti1b to the endosomal pathway.

375 Vti1b can move from TGN to late endosomes by binding to the AP1 interactor  
376 Clint1/EpsinR (Hirst et al. 2004). Ii, in addition to interacting to AP1, can also interact with  
377 AP2, responsible for internalization from the plasma membrane (Kongsvik et al. 2002;  
378 Hofmann et al. 1999). Ii is essential for efficient traffic of MHCII to the endosomal pathway  
379 and efficient antigen presentation (reviewed in (Neefjes et al. 2011)), but can also deliver other  
380 transmembrane proteins to endosomes, including CD70 (Zwart et al. 2010) and the FcR (Ye et  
381 al. 2008). We now suggest that Vti1b, due to its interaction with Ii, in antigen-presenting cells  
382 is sorted to the early endosomal pathway and thus participates in controlling endosomal  
383 maturation and fusion. As silencing of Vti1b leads to less endosomal fusion, we may also  
384 postulate that the Vti1b is instrumental for the Ii induced endosomal fusion (Nordeng et al.  
385 2002; Romagnoli et al. 1993; Stang and Bakke 1997).

386 We here show that both the fusogenic properties of Ii and the maturation delay depend  
387 on the presence of Vti1b as silencing Vti1b corrected the Ii induced maturation delay in M1  
388 cells. In this case, increased fusion mediated by Ii and the SNARE Vti1b and possibly other  
389 interactors on early endosomes would lead to a prolonged EE phase. Ii is also found to delay  
390 protein proteolysis (Gregers et al. 2003; Landsverk et al. 2011) and the part of the endosomal  
391 pathway that is trafficked by invariant chain would then create an ideal pathway for  
392 proteolytically processing instead of rapidly degrading antigenic proteins for MHC antigen  
393 loading of both MHCI, MHCII and CD1 that all associate with Ii.

394 Based on these data, we propose the following model (Fig 10). Ii binds directly or  
395 indirectly Vti1b for transport to endosomes, where can then engage in trans-SNARE complex  
396 formation. Higher degree of endosomal fusion dependent on a relocation of the “late” SNARE,  
397 Vti1b to early endosomes prolongs the EE phase and leads to a slower maturation creating a  
398 less proteolytic endosomal pathway. The model further postulate that as Ii positive endosomal  
399 vesicles engage in homotypic fusion, then not only Ii but also the associated molecules like  
400 MHCII will be concentrated in some late endosomal/lysosomal vesicles as in the MIIC  
401 compartment (Peters et al. 1991).

402 It is very interesting that the expression of a single protein, in this case Ii, a protein  
403 specific to antigen-presenting cells has the ability to reshape the endosomal pathway in a  
404 specific way. Our results support the notion that Ii not only increases the fusion of early  
405 endosomes by employing the late endosomal Qb-SNARE Vti1b but also affects endosomal  
406 maturation. Therefore, Ii is not only chaperoning MHCII to the loading compartment (MIIC),  
407 but is also involved in shaping this specialized organelle of professional APCs. The MIIC has  
408 a unique proteolytic environment, less aggressive than that of classical lysosomes (Neefjes  
409 1999) which is needed for efficient but not full processing of antigens. We suggest that this  
410 property is intricately connected to Ii’s ability of delaying endosomal maturation. In addition,  
411 the antigen loading compartments integrate antigen input from several other sources than  
412 endocytosis, such as phagocytosis, macropinocytosis and autophagy (Blum, Wearsch, and  
413 Cresswell 2013), but whether the transfer of these to the immunoendosome is by a general or  
414 a more specific mechanism is not known.

415 In conclusion, we show here that the Qb SNARE Vti1b is involved in Ii-mediated  
416 endosomal fusion. Ii redistributes Vti1b from the Golgi to early endosomes, which leads to  
417 increased fusion and also delayed maturation of endosomes. This mechanism of regulating  
418 endosomal fusion could be critical for efficient MHCI and II antigen presentation and thus  
419 normal immune responses.

420

421

422

## 423 **Materials and Methods**

### 424 **Cell lines**

425 The human fibroblast-like M1 cells (Royer-Pokora, Peterson, and Haseltine 1984) stably  
426 transfected with pMep4-Ii (Skjeldal et al. 2012), the human melanoma cell line Meljuso

427 (Johnson et al. 1981), the human lymphoblast cell line Raji (Pulvertaft 1964), the human  
428 adenocarcinoma HeLa cells (ATCC CCL-2) and the rat neuronal Neuro2A cell line (Cogli et  
429 al. 2013) were described before. Healthy donor derived Epstein-Barr virus growth-transformed  
430 lymphoblastoid cell lines (EBV-LCL) were provided by Sebastien Wälchli.

431 Mononuclear cells were isolated from buffy-coats from healthy donors through density-  
432 gradient centrifugation by using Lymphoprep® (Axis Shield). Buffy-coats from anonymous  
433 donors were obtained from the local blood bank (Section for Immunology and Blood  
434 Transfusion, Ullevål University Hospital, Oslo, Norway) according to the guidelines of the  
435 local blood bank approved by the Norwegian Regional Committee for Medical Research  
436 Ethics. Monocyte-derived dendritic cells (MDDCs) were generated from plastic adherent or  
437 directly isolated monocytes (Monocyte Isolation Kit II, Miltenyi Biotec) through culture for 6  
438 days in Roswell Park Memorial Institute medium (RPMI-1640; (Lonza) containing 100 ng/ml  
439 granulocyte-macrophage colony stimulating factor (GM-CSF; Immunotools) and 20 ng/ml IL-  
440 4 (Invitrogen, Life Technologies) supplemented with 10% fetal calf serum (FCS), 2 mM L-  
441 glutamine, 100 U/ml penicillin and 100 µg/ml streptomycin (Sigma).

442 M1 and HeLa cell lines were grown in Dulbecco's Modified Eagle's Medium (DMEM; Lonza)  
443 supplemented with 10% FCS, 2 mM L-glutamine, 100 U/ml penicillin and 100 µg/ml  
444 streptomycin (all Sigma). Additionally, 200 µg/ml hygromycin B (Sigma) was added to stably  
445 transfected M1 cells. Meljuso, Raji, EBV and MDDCs were grown in RPMI-1640  
446 supplemented with 10% FCS, 2 mM L-glutamine, 100 U/ml penicillin and 100 µg/ml  
447 streptomycin.

448 For live-cell microscopy, cells were grown in 35mm glass bottom dishes (MatTek), µ-Slide 8  
449 Well glass bottom (ibid), or 4-chamber 35mm glass bottom dish (CellVis) for 24 h in complete  
450 medium.

451

#### 452 **Establishment of CRISPR/Cas9 Ii KO cell lines**

453 Raji Cas9 and Ii knockout cell lines to be described elsewhere. Meljuso cells were transfected  
454 with px330 Sp-Cas9 and sgRNA vectors (12456 and 12458 targeting Ii exon 1) together with  
455 a vector coding for blasticidin resistance using Lipofectamine® 2000. Successfully transfected  
456 cells were selected by treatment with blasticidin for 1 week. Colonies grown from resistant  
457 cells were picked, expanded and screened for Ii knockout by Western blot.

458

#### 459 **Constructs**

460 mEGFP-C1 was a gift from Michael Davidson (Addgene plasmid # 54759). His6-Ii p33 wt and  
461 His6-Ii  $\Delta$ 27 in pCGFP-EU were purchased from GenScript. pCGFP-EU empty vector has been  
462 described before (Kawate and Gouaux 2006). mcherry-Rab5 Q79L has been described before  
463 (Bergeland et al. 2008). The Vti1b-mCitrine plasmid was constructed as follows: the coding  
464 sequence of human VTI1B was amplified by PCR using 5' and 3' primers containing an EcoRI  
465 and a BamHI restriction site, respectively. Forward primer was: 5'-  
466 AATCAGAATTCATGGCCTCCTCCG-3'. Reverse primer was 5'-  
467 CATCGGATCCCAATGGCTGCGAAAGAATTTG-3'. The fragment was then subcloned  
468 into pECFP-N1 plasmid cut with EcoRI and BamHI. The identity of all plasmids was  
469 confirmed by Sanger sequencing (GATC biotech).

470

### 471 **Antibodies and reagents**

472 Primary antibodies used were: mouse anti-Ii (clone M-B741, targeting the extracellular/luminal  
473 domain, 555538, 1:500) and mouse anti-EEA1 (610456, 1:200 for immunofluorescence;  
474 1:1000 for western blot) from BD Biosciences; mouse anti-tubulin (13-8000, 1:12000) from  
475 Life Technologies; rabbit anti-Rab7a (2094S, 1:500) from Cell Signaling; rabbit anti-GFP  
476 (ab6556, 1:2000), rabbit anti-Vti1b (ab184170, 1:200 for Western blot, 1:100 for  
477 immunofluorescence), rabbit anti-CI-M6PR (ab32815, 1:200) and mouse anti-Rab9 (ab2810,  
478 1:300) from Abcam; mouse anti-Rab7b (H00338382-M01, 1:300) from Abnova, and mouse  
479 anti-LAMPI (H4A3, 1:500 for immunofluorescence; 1:4000 for western blot) from  
480 Developmental Hybridoma Bank. AlexaFluor™ secondary antibodies (Invitrogen) were used  
481 for immunofluorescence analysis at 1:200 dilution. Secondary antibodies conjugated with  
482 horseradish peroxidase (GE Healthcare) were used at 1:5000 for immunoblotting.

483 Anti-Ii for live immunostaining was labelled using Monoclonal antibody labeling kit  
484 (Molecular Probes) according to manufacturer's protocol with AlexaFluor™-488, -555, or -  
485 647, respectively.

486 Hoechst dye (H3569, Life Technologies) was used at 0.2  $\mu$ g/ml. LysoTracker® Red DND-99  
487 (LTR), used at a concentration of 100 nM, LysoTracker® DeepRed, used at a concentration of  
488 50 nM, 8-Hydroxypyrene-1,3,6-trisulfonic acid trisodium salt (HPTS), used at 1 mM  
489 concentration, and dextran AlexaFluor 488 10,000 MW, used at a concentration of 0,5 mg/ml,  
490 were purchased from Thermo Fisher.

491 Poly-L-lysine (PLL, 0.01% solution), Wortmannin and N-ethylmaleimide (NEM) were all  
492 purchased from Sigma.

493

494 **siRNA transfection**

495 Individual siRNAs were transfected by forward transfection using Lipofectamine® RNAiMax  
496 reagent (Thermo Fisher) according to manufacturer's protocol. In brief, 250,000 cells/well  
497 were seeded in 6-well plates (VWR) in 1 ml antibiotic-free medium 24h prior to transfection.  
498 Transfection mixes were prepared by diluting 2.5 µl siRNA stock (80 µM) in 250 µl Opti-  
499 MEM and 6 µl RNAiMax in 250 µl Opti-MEM followed by immediate mixing of both. The  
500 transfection mixture was then incubated at room temperature for 20 min before addition to the  
501 cells. 4h after transfection 1 ml of complete medium was added. Medium on the cells was  
502 replaced the next day. 48h after transfections, cells were washed twice with pre-warmed PBS,  
503 trypsinized for 1min, resuspended in 2 ml complete medium and split between 35 mm imaging  
504 dishes (MatTek) or 8-well slides (ibidi) for imaging and 6-well plates for lysis and subsequent  
505 biochemical assays.

506

507 **Plasmid transfection**

508 For plasmid transfection, cells were transfected using Lipofectamine® 2000 (Thermo Fisher)  
509 according to manufacturer's protocol. In brief, cells were seeded the day before transfection.  
510 Before transfection, the medium was replaced by Opti-MEM® (Thermo Fisher). Transfection  
511 mixes were prepared with 1.5 µl Lipofectamine® 2000 (Thermo Fisher) per 1 µg of plasmid  
512 DNA. The transfection mix was then added drop-wise to the cells.

513

514 **Immunofluorescence**

515 For immunofluorescence, cells were grown on 10x10mm #1.5 high precision coverslips  
516 (Marienfeld). Cells were washed twice with ice-cold PBS, fixed at room temperature for 15  
517 min with 3% PFA, quenched for 2 min with 50 mM NH<sub>4</sub>Cl, washed again twice with PBS,  
518 permeabilized for 15 min with 0.25% saponin (Sigma) in PBS, incubated with primary  
519 antibody for 20 min, washed 3 times for 5 min each with 0.1% saponin in PBS, incubated with  
520 appropriate secondary antibody for 20 min in the dark, washed three times for 5 min each with  
521 0.1% saponin in PBS, washed twice with PBS, and mounted with mowiol on glass slides  
522 (Thermo Scientific).

523

524 **Endocytic trafficking assay**

525 Cells were grown for 24h on 35mm glass bottom dishes (MatTek) or 35 mm 4-chamber glass  
526 bottom dishes (CellVis) in complete medium without phenol red. LTR was added and cells  
527 incubated for another 15 min at 37°C before addition of HPTS, 10 min before start of time-



528 lapse imaging. For dextran internalization assay, cells have been incubated with 0,5 mg/ml  
529 dextran and LysoTracker Deep Red for five minutes. Then, cells have been washed three times  
530 and imaged every five minutes.

531

### 532 **Confocal Imaging**

533 For the siRNA screen, imaging was performed on an Olympus FV1000 XV81 confocal laser  
534 scanning microscope (inverted) equipped with a UPLSAPO 60x 1.35NA oil immersion  
535 objective. Images of cells transfected with individual siRNAs were acquired on a Leica SP8  
536 DMI8-CS confocal microscope equipped with a HC PL Apo 40x 1.3NA oil immersion  
537 objective.

538 Live imaging of transfected cells and imaging of immunostained cells was performed on a  
539 Zeiss LSM880 microscope equipped with a Plan Apo 63x 1.4NA oil immersion objective. Live  
540 cells were imaged using Fast AiryScan mode with optimal sampling for super-resolution.

541 Time-lapse imaging to study the trafficking of HPTS to acidic compartments was performed  
542 on a Zeiss LSM880 microscope, equipped with a Plan Apo 40x 1.3NA oil immersion objective.  
543 Z stacks of 5 slices each were acquired at intervals of 1  $\mu\text{m}$  every 10 min for a total of 200 min  
544 at multiple positions. Hardware-based autofocus (DefiniteFocus.2) was performed at every  
545 position and every time-point. Fluorescence emission of HPTS and LTR was separated by  
546 linear unmixing based on reference spectra obtained from single stained samples.

547

### 548 **Image processing and analysis**

549 Endosome size was quantified by using ImageJ software. In brief, confocal 3D stacks were  
550 maximum projected, in case of EGFP-Rab5Q79L images, the cytosolic background was  
551 subtracted by rolling ball background subtraction. The resulting images were then binarized  
552 by using a manually adjusted threshold for each image. After that, the images were inverted,  
553 morphologically opened, objects split by watershed processing and manual splitting where  
554 needed. Finally, the analyse particles function was used to measure all objects. The Feret's  
555 diameter was used as the measurement of object size and objects larger than 3  $\mu\text{m}$  were  
556 considered enlarged endosomes.

557 LTR colocalization was quantified using the colocalization function in ZEN blue software  
558 (Zeiss). In brief, scatter plots were used to define thresholds on the centre z slice for each  
559 position. The ratio of overlapped pixels to all LTR-positive pixels was then calculated for all  
560 slices of a z stack, summed for each position and compared between conditions using excel  
561 software (Microsoft).

562

### 563 **Immunoblotting**

564 Cell lysates were subjected to SDS-PAGE followed by blotting onto polyvinylidene fluoride  
565 (PVDF) membranes (Millipore), and probed with each primary antibody diluted in 2% blotting-  
566 grade non-fat dry milk (BioRad). Next, membranes were incubated with secondary antibodies  
567 conjugated to HRP and subsequently with SuperSignal West Femto Maximum Sensitivity  
568 Substrate (Thermo Fisher) before digital imaging (Kodak image station 4000R) or  
569 Amersham™ ECL Prime Western Blotting Detection Reagent before exposure on  
570 Amersham™ Hyperfilm ECL (both GE Healthcare).

571

### 572 **Statistical analysis**

573 If not indicated otherwise, columns and error bars represent the mean  $\pm$  standard error of the  
574 mean (s.e.m.) of at least three independent experiments. Treatments were compared to control  
575 using two-tailed Student's t-test, either paired or unpaired as appropriate (excel). Differences  
576 were considered statistically significant at  $p < 0.05$  (indicated by \*),  $p < 0.01$  (\*\*), and  $p < 0.001$   
577 (\*\*\*), respectively.

578

### 579 **Co-Immunoprecipitation**

580 Co-Immunoprecipitation experiments using GFP-trap® (ChromoTek) were performed  
581 according to manufacturer's protocol. In brief,  $1-2 \times 10^6$  cells were seeded on 10 cm cell culture  
582 dishes and incubated for 24 h at 37°C, 5% CO<sub>2</sub>. The cells were then transfected using  
583 Lipofectamine 2000 as described earlier. M1 pMep4-Ii cells were treated with 7  $\mu$ M CdCl<sub>2</sub>  
584 overnight to induce expression of Ii. Cells were washed twice with ice-cold PBS and lysed in  
585 200  $\mu$ l lysis buffer (100 mM NaCl, 1 mM EDTA, Complete® protease inhibitors (Sigma), 1  
586 mM PMSF (Phenylmethylsulfonylfluorid, Sigma), 0.5% NP-40) for 30 min on ice. Lysates  
587 were cleared by centrifugation at 13,000 x g for 10 min at 4°C, diluted with 300  $\mu$ l buffer and  
588 loaded on magnetic agarose anti-GFP beads (GFP-trap®\_MA, ChromoTek) for 1 h at 4°C.  
589 Beads were then washed three times. Proteins were eluted using 2x Laemmli sample buffer  
590 with freshly added D-thiotreitol (200 mM, Sigma) for 10 min at 95°C.

591

### 592 **Acknowledgements**

593 We thank Sebastien Wälchli (University of Oslo) for providing the EBV cells and Cecilia Bucci  
594 (University of Salento) for providing the Neuro2A cells. We thank Michael Davidson (Florida

595 State University) for providing the mEGFP-C1 plasmid through Addgene and Jens P. Morth  
596 (University of Oslo) for the pCGFP-EU empty vector. Finally, we thank the NorMIC Oslo  
597 imaging platform, Department of Biosciences, University of Oslo.

598 We gratefully acknowledge the support from the Research Council of Norway (Grants 214183,  
599 and 230770 to OB) and the Norwegian Cancer Society (grant 113472 to OB).

600

## 601 **Author contributions**

602 DF and AM designed, performed, analyzed the majority of the experiments, MD contributed  
603 to the IP experiments and WB experiment in different cell types. LJ and JN generated the  
604 Meljuso Ii knock-out cell line, MM and JT generated the Raji Ii knock-out cell line. OB  
605 coordinated the project and DF, AM and OB wrote the manuscript. All co-authors approved  
606 the final version of the manuscript.

607

## 608 **Conflict of interest**

609 The authors declare no conflict of interest.

610

## 611 **References**

612

- 613 Antonin, W., C. Holroyd, D. Fasshauer, S. Pabst, G. F. Von Mollard, and R. Jahn. 2000. 'A  
614 SNARE complex mediating fusion of late endosomes defines conserved properties of  
615 SNARE structure and function', *EMBO J*, 19: 6453-64.
- 616 Bakke, O., and B. Dobberstein. 1990. 'MHC class II-associated invariant chain contains a  
617 sorting signal for endosomal compartments', *Cell*, 63: 707-16.
- 618 Bergeland, T., L. Haugen, O. J. Landsverk, H. Stenmark, and O. Bakke. 2008. 'Cell-cycle-  
619 dependent binding kinetics for the early endosomal tethering factor EEA1', *EMBO Rep*,  
620 9: 171-8.
- 621 Bikoff, E. K., L. Y. Huang, V. Episkopou, J. van Meerwijk, R. N. Germain, and E. J. Robertson.  
622 1993. 'Defective major histocompatibility complex class II assembly, transport, peptide  
623 acquisition, and CD4+ T cell selection in mice lacking invariant chain expression', *J*  
624 *Exp Med*, 177: 1699-712.
- 625 Blum, J. S., P. A. Wearsch, and P. Cresswell. 2013. 'Pathways of antigen processing', *Annu*  
626 *Rev Immunol*, 31: 443-73.
- 627 Bremnes, B., T. Madsen, M. Gedde-Dahl, and O. Bakke. 1994. 'An LI and ML motif in the  
628 cytoplasmic tail of the MHC-associated invariant chain mediate rapid internalization', *J*  
629 *Cell Sci*, 107 ( Pt 7): 2021-32.
- 630 Brunger, A. T. 2005. 'Structure and function of SNARE and SNARE-interacting proteins', *Q*  
631 *Rev Biophys*, 38: 1-47.
- 632 Cogli, L., C. Progida, C. L. Thomas, B. Spencer-Dene, C. Donno, G. Schiavo, and C. Bucci.  
633 2013. 'Charcot-Marie-Tooth type 2B disease-causing RAB7A mutant proteins show  
634 altered interaction with the neuronal intermediate filament peripherin', *Acta*  
635 *Neuropathol*, 125: 257-72.

- 636 Cuenda, A., J. Rouse, Y. N. Doza, R. Meier, P. Cohen, T. F. Gallagher, P. R. Young, and J.  
637 C. Lee. 1995. 'SB 203580 is a specific inhibitor of a MAP kinase homologue which is  
638 stimulated by cellular stresses and interleukin-1', *FEBS Lett*, 364: 229-33.
- 639 Elliott, E. A., J. R. Drake, S. Amigorena, J. Elsemore, P. Webster, I. Mellman, and R. A. Flavell.  
640 1994. 'The invariant chain is required for intracellular transport and function of major  
641 histocompatibility complex class II molecules', *J Exp Med*, 179: 681-94.
- 642 Elliott, T., and J. Neefjes. 2006. 'The complex route to MHC class I-peptide complexes', *Cell*,  
643 127: 249-51.
- 644 Fasshauer, D., R. B. Sutton, A. T. Brunger, and R. Jahn. 1998. 'Conserved structural features  
645 of the synaptic fusion complex: SNARE proteins reclassified as Q- and R-SNAREs',  
646 *Proc Natl Acad Sci U S A*, 95: 15781-6.
- 647 Genuardi, M., and G. F. Saunders. 1988. 'Localization of the HLA class II-associated invariant  
648 chain gene to human chromosome band 5q32', *Immunogenetics*, 28: 53-6.
- 649 Gorvel, J. P., J. M. Escola, E. Stang, and O. Bakke. 1995. 'Invariant chain induces a delayed  
650 transport from early to late endosomes', *J Biol Chem*, 270: 2741-6.
- 651 Gregers, T. F., T. W. Nordeng, H. C. Birkeland, I. Sandlie, and O. Bakke. 2003. 'The  
652 cytoplasmic tail of invariant chain modulates antigen processing and presentation', *Eur*  
653 *J Immunol*, 33: 277-86.
- 654 Haugen, L. H., F. M. Skjeldal, T. Bergeland, and O. Bakke. 2017. 'Endosomal binding kinetics  
655 of Eps15 and Hrs specifically regulate the degradation of RTKs', *Sci Rep*, 7: 17962.
- 656 Hille-Rehfeld, A. 1995. 'Mannose 6-phosphate receptors in sorting and transport of lysosomal  
657 enzymes', *Biochim Biophys Acta*, 1241: 177-94.
- 658 Hirst, J., S. E. Miller, M. J. Taylor, G. F. von Mollard, and M. S. Robinson. 2004. 'EpsinR is an  
659 adaptor for the SNARE protein Vti1b', *Mol Biol Cell*, 15: 5593-602.
- 660 Hofmann, M. W., S. Honing, D. Rodionov, B. Dobberstein, K. von Figura, and O. Bakke. 1999.  
661 'The leucine-based sorting motifs in the cytoplasmic domain of the invariant chain are  
662 recognized by the clathrin adaptors AP1 and AP2 and their medium chains', *J Biol*  
663 *Chem*, 274: 36153-8.
- 664 Jahn, R., and R. H. Scheller. 2006. 'SNAREs--engines for membrane fusion', *Nat Rev Mol Cell*  
665 *Biol*, 7: 631-43.
- 666 Johnson, J. P., M. Demmer-Dieckmann, T. Meo, M. R. Hadam, and G. Riethmuller. 1981.  
667 'Surface antigens of human melanoma cells defined by monoclonal antibodies. I.  
668 Biochemical characterization of two antigens found on cell lines and fresh tumors of  
669 diverse tissue origin', *Eur J Immunol*, 11: 825-31.
- 670 Jones, A. T., and M. J. Clague. 1995. 'Phosphatidylinositol 3-kinase activity is required for  
671 early endosome fusion', *Biochem J*, 311 ( Pt 1): 31-4.
- 672 Kawate, T., and E. Gouaux. 2006. 'Fluorescence-detection size-exclusion chromatography for  
673 precrystallization screening of integral membrane proteins', *Structure*, 14: 673-81.
- 674 Kongsvik, T. L., S. Honing, O. Bakke, and D. G. Rodionov. 2002. 'Mechanism of interaction  
675 between leucine-based sorting signals from the invariant chain and clathrin-associated  
676 adaptor protein complexes AP1 and AP2', *J Biol Chem*, 277: 16484-8.
- 677 Kreykenbohm, V., D. Wenzel, W. Antonin, V. Atlachkine, and G. F. von Mollard. 2002. 'The  
678 SNAREs vti1a and vti1b have distinct localization and SNARE complex partners', *Eur*  
679 *J Cell Biol*, 81: 273-80.
- 680 Landsverk, O. J., O. Bakke, and T. F. Gregers. 2009. 'MHC II and the endocytic pathway:  
681 regulation by invariant chain', *Scand J Immunol*, 70: 184-93.
- 682 Landsverk, O. J., N. Barois, T. F. Gregers, and O. Bakke. 2011. 'Invariant chain increases the  
683 half-life of MHC II by delaying endosomal maturation', *Immunol Cell Biol*, 89: 619-29.
- 684 Linstedt, A. D., and H. P. Hauri. 1993. 'Giantin, a novel conserved Golgi membrane protein  
685 containing a cytoplasmic domain of at least 350 kDa', *Mol Biol Cell*, 4: 679-93.
- 686 Luzio, J. P., M. D. Parkinson, S. R. Gray, and N. A. Bright. 2009. 'The delivery of endocytosed  
687 cargo to lysosomes', *Biochem Soc Trans*, 37: 1019-21.
- 688 Motta, A., P. Amodeo, P. Fucile, M. A. Castiglione Morelli, B. Bremnes, and O. Bakke. 1997.  
689 'A new triple-stranded alpha-helical bundle in solution: the assembling of the cytosolic  
690 tail of MHC-associated invariant chain', *Structure*, 5: 1453-64.

- 691 Neefjes, J. 1999. 'CIIV, MIIC and other compartments for MHC class II loading', *Eur J Immunol*,  
692 29: 1421-5.
- 693 Neefjes, J. J., and H. L. Ploegh. 1992. 'Inhibition of endosomal proteolytic activity by leupeptin  
694 blocks surface expression of MHC class II molecules and their conversion to SDS  
695 resistance alpha beta heterodimers in endosomes', *EMBO J*, 11: 411-6.
- 696 Neefjes, J., M. L. Jongsma, P. Paul, and O. Bakke. 2011. 'Towards a systems understanding  
697 of MHC class I and MHC class II antigen presentation', *Nat Rev Immunol*, 11: 823-36.
- 698 Nordeng, T. W., T. F. Gregers, T. L. Kongsvik, S. Meresse, J. P. Gorvel, F. Jourdan, A. Motta,  
699 and O. Bakke. 2002. 'The cytoplasmic tail of invariant chain regulates endosome fusion  
700 and morphology', *Mol Biol Cell*, 13: 1846-56.
- 701 Peters, P. J., J. J. Neefjes, V. Oorschot, H. L. Ploegh, and H. J. Geuze. 1991. 'Segregation of  
702 MHC class II molecules from MHC class I molecules in the Golgi complex for transport  
703 to lysosomal compartments', *Nature*, 349: 669-76.
- 704 Peters, P. J., G. Raposo, J. J. Neefjes, V. Oorschot, R. L. Leijendekker, H. J. Geuze, and H.  
705 L. Ploegh. 1995. 'Major histocompatibility complex class II compartments in human B  
706 lymphoblastoid cells are distinct from early endosomes', *J Exp Med*, 182: 325-34.
- 707 Pieters, J., O. Bakke, and B. Dobberstein. 1993. 'The MHC class II-associated invariant chain  
708 contains two endosomal targeting signals within its cytoplasmic tail', *J Cell Sci*, 106 ( Pt  
709 3): 831-46.
- 710 Powis, G., R. Bonjouklian, M. M. Berggren, A. Gallegos, R. Abraham, C. Ashendel, L. Zalkow,  
711 W. F. Matter, J. Dodge, G. Grindey, and et al. 1994. 'Wortmannin, a potent and  
712 selective inhibitor of phosphatidylinositol-3-kinase', *Cancer Res*, 54: 2419-23.
- 713 Prescott, A. R., J. M. Lucocq, J. James, J. M. Lister, and S. Ponnambalam. 1997. 'Distinct  
714 compartmentalization of TGN46 and beta 1,4-galactosyltransferase in HeLa cells', *Eur  
715 J Cell Biol*, 72: 238-46.
- 716 Pryor, P. R., B. M. Mullock, N. A. Bright, M. R. Lindsay, S. R. Gray, S. C. Richardson, A.  
717 Stewart, D. E. James, R. C. Piper, and J. P. Luzio. 2004. 'Combinatorial SNARE  
718 complexes with VAMP7 or VAMP8 define different late endocytic fusion events', *EMBO  
719 Rep*, 5: 590-5.
- 720 Pulvertaft, J. V. 1964. 'Cytology of Burkitt's Tumour (African Lymphoma)', *Lancet*, 1: 238-40.
- 721 Roche, P. A., C. L. Teletski, E. Stang, O. Bakke, and E. O. Long. 1993. 'Cell surface HLA-DR-  
722 invariant chain complexes are targeted to endosomes by rapid internalization', *Proc  
723 Natl Acad Sci U S A*, 90: 8581-5.
- 724 Romagnoli, P., C. Layet, J. Yewdell, O. Bakke, and R. N. Germain. 1993. 'Relationship  
725 between invariant chain expression and major histocompatibility complex class II  
726 transport into early and late endocytic compartments', *J Exp Med*, 177: 583-96.
- 727 Royer-Pokora, B., W. D. Peterson, Jr., and W. A. Haseltine. 1984. 'Biological and biochemical  
728 characterization of an SV40-transformed xeroderma pigmentosum cell line', *Exp Cell  
729 Res*, 151: 408-20.
- 730 Sand, K. M., O. J. Landsverk, A. Berg-Larsen, O. Bakke, and T. F. Gregers. 2014. 'The human-  
731 specific invariant chain isoform Iip35 modulates Iip33 trafficking and function', *Immunol  
732 Cell Biol*, 92: 791-8.
- 733 Schroder, B. 2016. 'The multifaceted roles of the invariant chain CD74--More than just a  
734 chaperone', *Biochim Biophys Acta*, 1863: 1269-81.
- 735 Skjeldal, F. M., S. Strunze, T. Bergeland, E. Walseng, T. F. Gregers, and O. Bakke. 2012.  
736 'The fusion of early endosomes induces molecular-motor-driven tubule formation and  
737 fission', *J Cell Sci*, 125: 1910-9.
- 738 Stang, E., and O. Bakke. 1997. 'MHC class II-associated invariant chain-induced enlarged  
739 endosomal structures: a morphological study', *Exp Cell Res*, 235: 79-92.
- 740 Stenmark, H., R. G. Parton, O. Steele-Mortimer, A. Lutcke, J. Gruenberg, and M. Zerial. 1994.  
741 'Inhibition of rab5 GTPase activity stimulates membrane fusion in endocytosis', *EMBO  
742 J*, 13: 1287-96.
- 743 Wade, N., N. J. Bryant, L. M. Connolly, R. J. Simpson, J. P. Luzio, R. C. Piper, and D. E.  
744 James. 2001. 'Syntaxin 7 complexes with mouse Vps10p tail interactor 1b, syntaxin 6,

745 vesicle-associated membrane protein (VAMP)8, and VAMP7 in b16 melanoma cells',  
746 *J Biol Chem*, 276: 19820-7.  
747 Wegner, C. S., L. Malerod, N. M. Pedersen, C. Progidia, O. Bakke, H. Stenmark, and A. Brech.  
748 2010. 'Ultrastructural characterization of giant endosomes induced by GTPase-  
749 deficient Rab5', *Histochem Cell Biol*, 133: 41-55.  
750 Weimbs, T., S. H. Low, S. J. Chapin, K. E. Mostov, P. Bucher, and K. Hofmann. 1997. 'A  
751 conserved domain is present in different families of vesicular fusion proteins: a new  
752 superfamily', *Proc Natl Acad Sci U S A*, 94: 3046-51.  
753 Wymann, M. P., G. Bulgarelli-Leva, M. J. Zvelebil, L. Pirola, B. Vanhaesebroeck, M. D.  
754 Waterfield, and G. Panayotou. 1996. 'Wortmannin inactivates phosphoinositide 3-  
755 kinase by covalent modification of Lys-802, a residue involved in the phosphate  
756 transfer reaction', *Mol Cell Biol*, 16: 1722-33.  
757 Ye, L., X. Liu, S. N. Rout, Z. Li, Y. Yan, L. Lu, T. Kamala, N. K. Nanda, W. Song, S. K. Samal,  
758 and X. Zhu. 2008. 'The MHC class II-associated invariant chain interacts with the  
759 neonatal Fc gamma receptor and modulates its trafficking to endosomal/lysosomal  
760 compartments', *J Immunol*, 181: 2572-85.  
761 Zwart, W., V. Peperzak, E. de Vries, A. M. Keller, G. van der Horst, E. A. Veraar, U. Geumann,  
762 H. Janssen, L. Janssen, S. H. Naik, J. Neefjes, and J. Borst. 2010. 'The invariant chain  
763 transports TNF family member CD70 to MHC class II compartments in dendritic cells',  
764 *J Cell Sci*, 123: 3817-27.  
765

766

## 767 Figures and Figure Legends

768

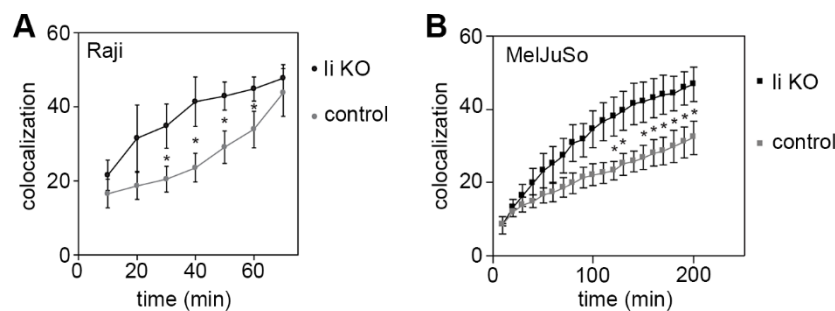

Figure 1

769

770 **Figure 1. Li KO speeds up trafficking of HPTS.** A) The colocalization coefficient (% pixel  
771 overlap of LysoTracker Red with HPTS) in wt Raji cells expressing Cas9 (control) or Li  
772 knockout (Li KO) was analysed and is represented by line graphs for control (●) and Li KO (●)  
773 indicating mean  $\pm$  SEM of 6 independent experiments. B) Same as for A) in wt MeljuSo cells  
774 (control, ●) or Li KO (●) in showing mean  $\pm$  SEM for 3 independent experiments.  
775

775

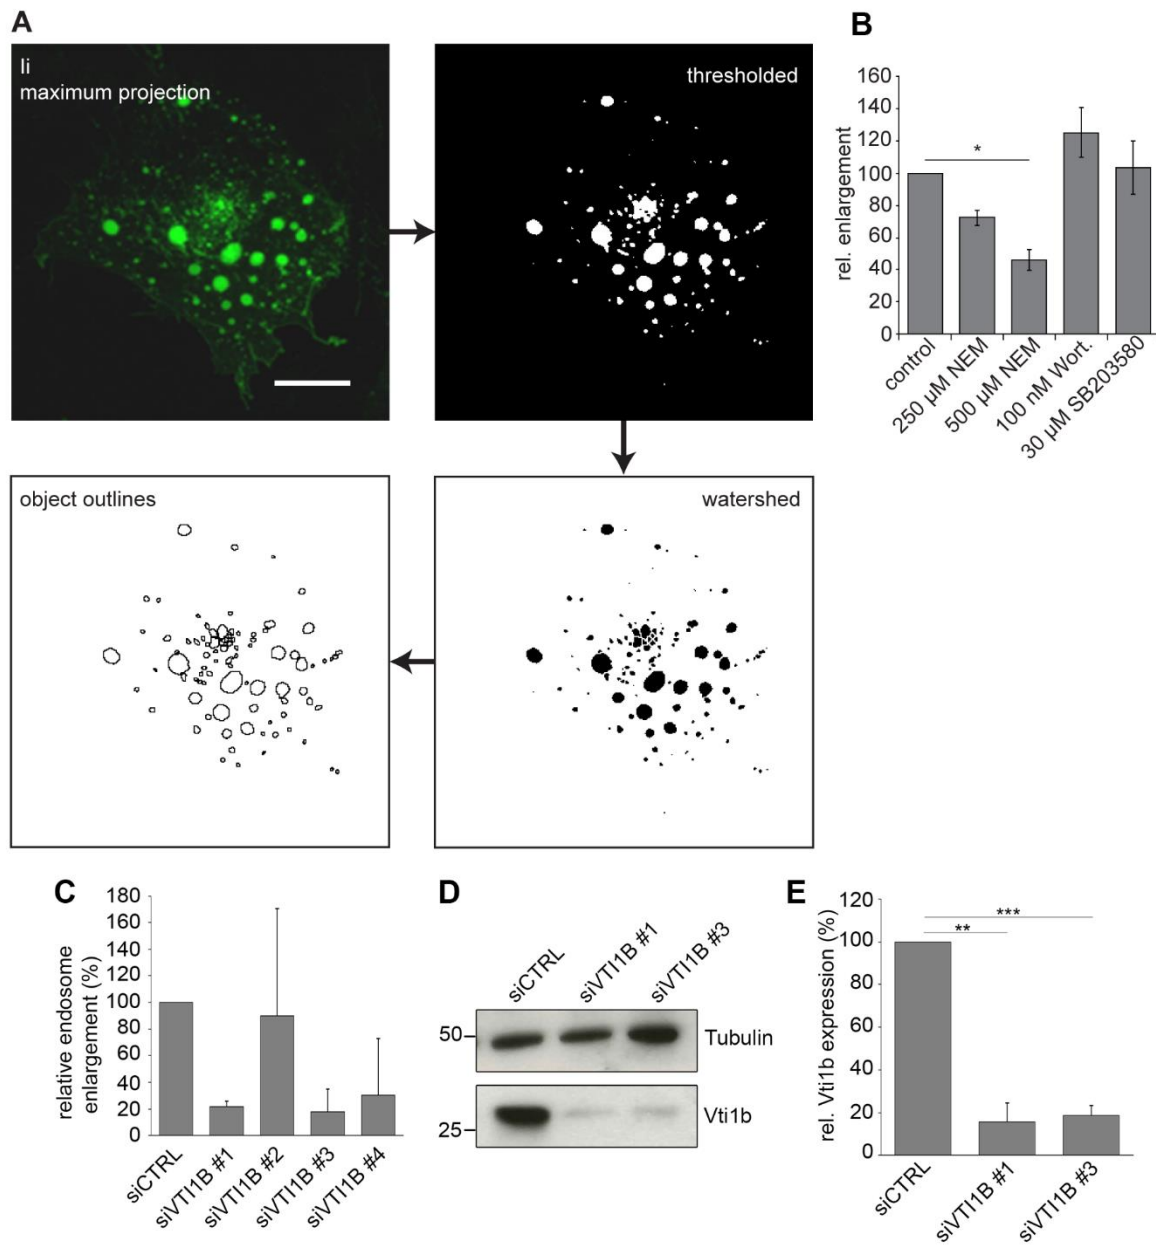

Figure 2

776

777 **Figure 2. Ii-induced enlargement of endosomes is dependent of Vti1b.** A) Workflow  
778 diagram of the image processing for the quantification of endosome size. Scale bar: 10  $\mu$ m. C)  
779 Results of endosome quantification after treatment with different drugs affecting early  
780 endosome fusion, mean  $\pm$  s.e.m. of three independent experiments. D) Quantifications results  
781 of enlarged endosomes (bigger than 3  $\mu$ m in diameter) for four individual oligonucleotides  
782 targeting Vti1b compared to control siRNA (non-targeting, siCTRL) reported as relative  
783 endosome enlargement. E) M1-pMep4-Ii cells transfected with control siRNA or siRNA  
784 against Vti1b were lysed and subjected to western blot analysis using anti-Vti1b and anti-

785 tubulin antibodies. Detection of tubulin has been used as loading control. F) Quantification of  
786 Vti1b abundance is shown. Data represent the mean  $\pm$  s.e.m. of three independent experiments.  
787  
788

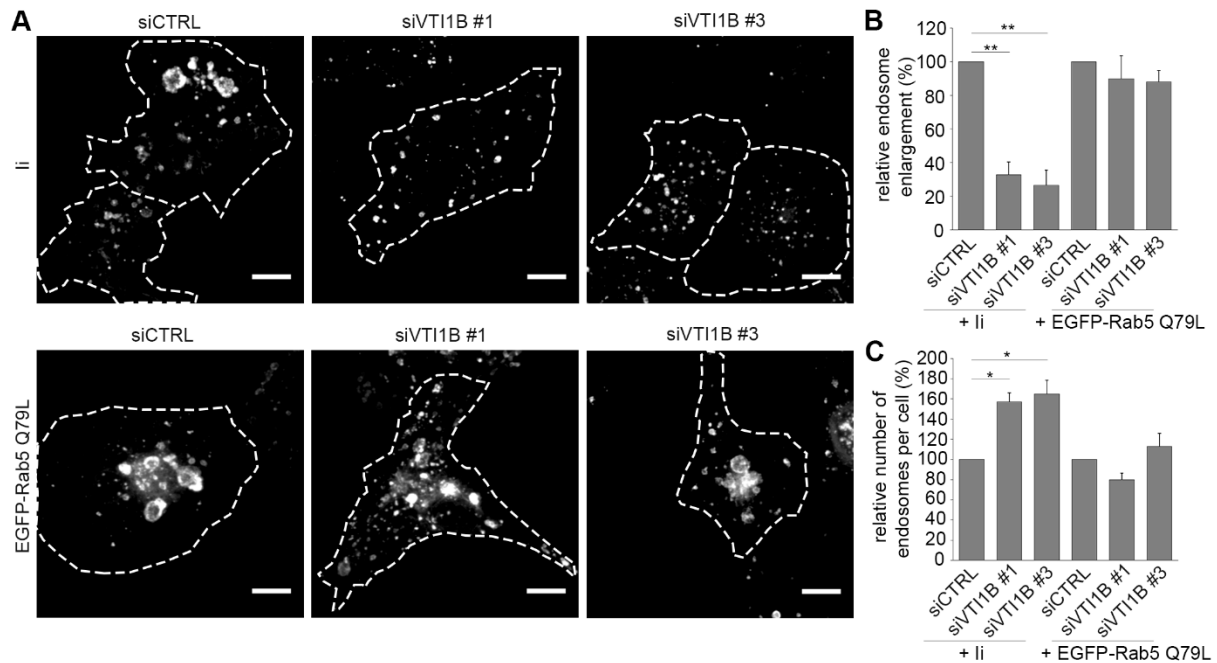

Figure 3

789  
790 **Figure 3. Vti1b specifically reduce Ii-mediated endosome enlargement.** A) M1-pMep4-Ii  
791 cells were transfected with control siRNA (siCTRL) or siRNAs targeting VTI1B (siVTI1B #1  
792 and siVTI1B #3). After 48h of transfection cells were either treated overnight with 7 $\mu$ M CdCl<sub>2</sub>  
793 to induce Ii expression (top row) or transfected with EGFP-Rab5Q79L (bottom row) as  
794 indicated. Cells expressing Ii have been treated with anti-Ii antibody coupled with an Alexa  
795 Fluor 488 fluorescent dye for 30 minutes before fixation and imaging. Confocal images are  
796 shown. Dashed lines indicate the shape of the cells. Scale bars: 10  $\mu$ m. B) Quantification of the  
797 percentage of endosomes (diameter  $\geq$  3  $\mu$ m) in control and Vti1b silenced cells expressing either  
798 Ii or EGFP-Rab5Q79L. Data represent the mean  $\pm$  s.e.m. of three different experiments (n=50).  
799 C) Quantification of the number of endosomes per cell in control and Vti1b silenced cells  
800 expressing either Ii or Rab5Q79L. Data represent the mean  $\pm$  s.e.m. of three different  
801 experiments.

802



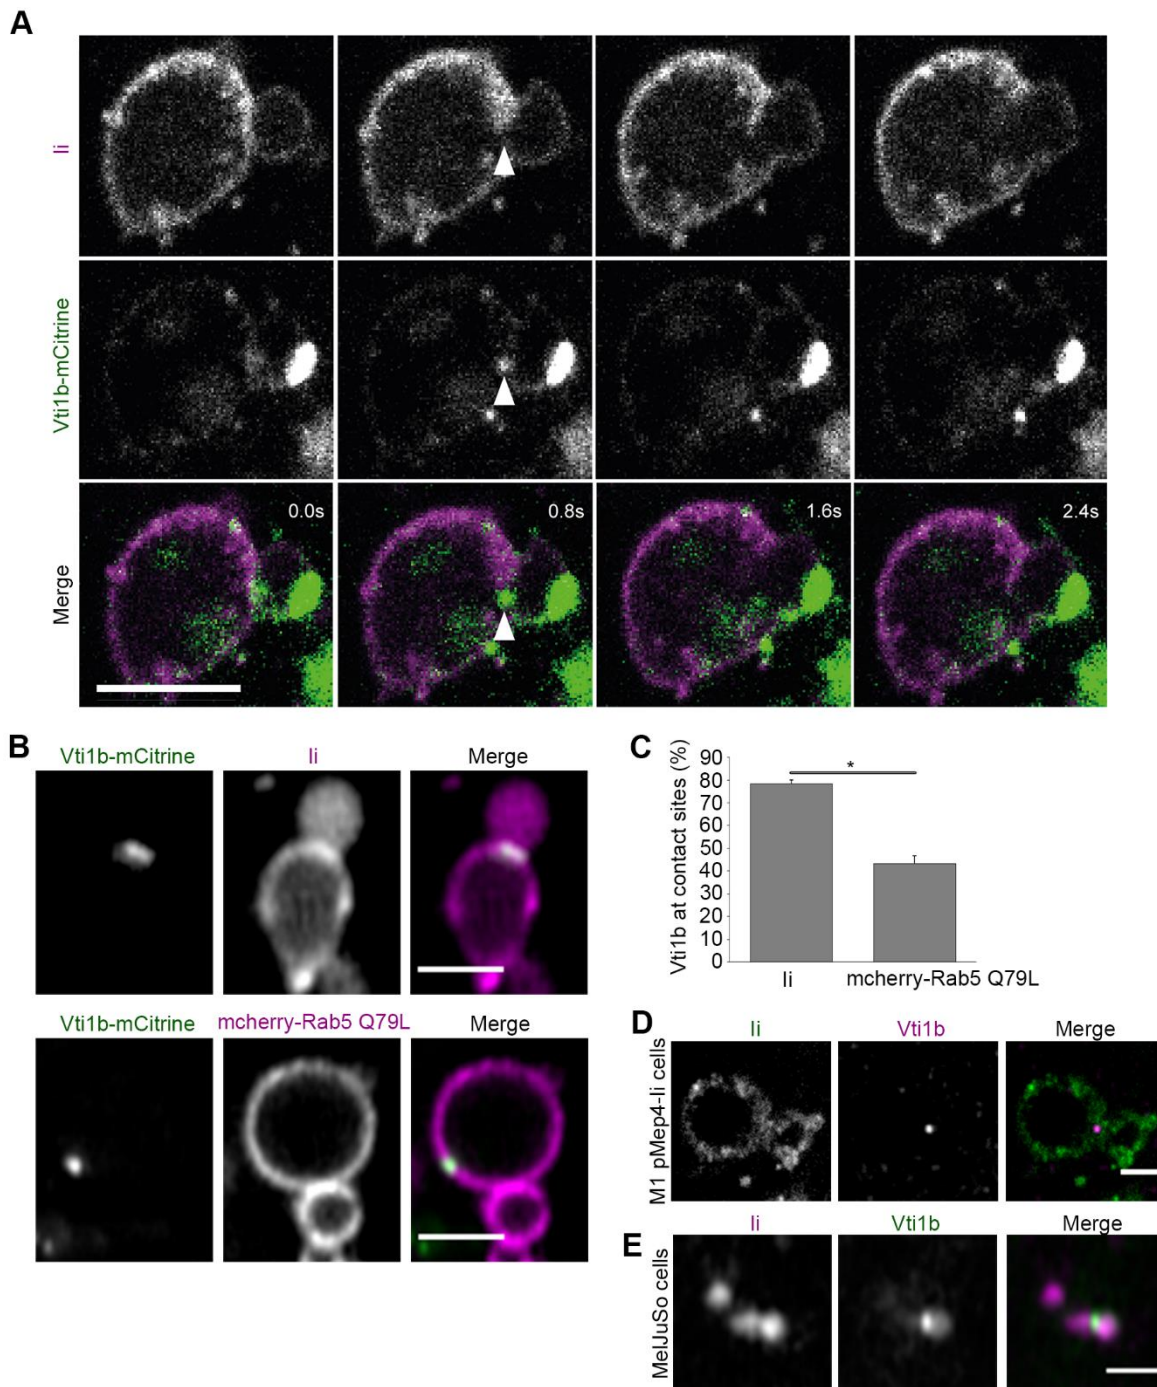

Figure 4

803

804 **Figure 4. Vti1b localizes to contact sites at Ii-positive endosomes during fusion.** A) M1  
 805 pMep4-Ii cells were transiently transfected with Vti1b-mCitrine o/n and Ii was expressed for 8  
 806 h (7 $\mu$ M CdCl<sub>2</sub> added). Cells were treated with anti-Ii antibody coupled with Alexa Fluor 647  
 807 for 1 hour before live imaging. Time-lapse confocal images of Ii (magenta) and Vti1b-mCitrine  
 808 (green) during endosome fusion are shown. Scale bar: 2  $\mu$ m. B) M1 pMep4-Ii cells were either  
 809 transiently transfected with Vti1b-mCitrine and treated with 7 $\mu$ M CdCl<sub>2</sub> for 8h to induce Ii

810 expression (top row) or co-transfected with Vti1b-mCitrine and mCherry-Rab5Q79L (bottom  
811 row). Cells expressing Ii were treated with anti-Ii antibody coupled with an Alexa Fluor 647  
812 fluorescent dye antibody for 1 hour before imaged live by Fast AiryScan. Scale bar: 2  $\mu$ m. C)  
813 Quantification of the percentage of Vti1b localized at the contact sites in cells expressing also  
814 Ii or Rab5Q79L as indicated is shown. Data represent the mean  $\pm$  SEM of three independent  
815 experiments. D) M1 pMep4-Ii cells were treated with 7  $\mu$ M CdCl<sub>2</sub> for 8 h to induce Ii  
816 expression. Cells were treated with anti-Ii antibody coupled with an Alexa Fluor 647  
817 fluorescent dye for 1 hour before fixation and immunostaining for Vti1b. Representative  
818 images of Ii (green) and endogenous Vti1b (magenta) positive endosomes are shown. Scale  
819 bars: 2  $\mu$ m. E) Meljuso cells were treated with anti-Ii antibody coupled with an Alexa Fluor  
820 647 fluorescent dye for 4 hours before fixation and immunostaining for Vti1b. Representative  
821 images of Ii (magenta) and endogenous Vti1b (green) positive endosomes are shown. Scale  
822 bar: 1  $\mu$ m.

823

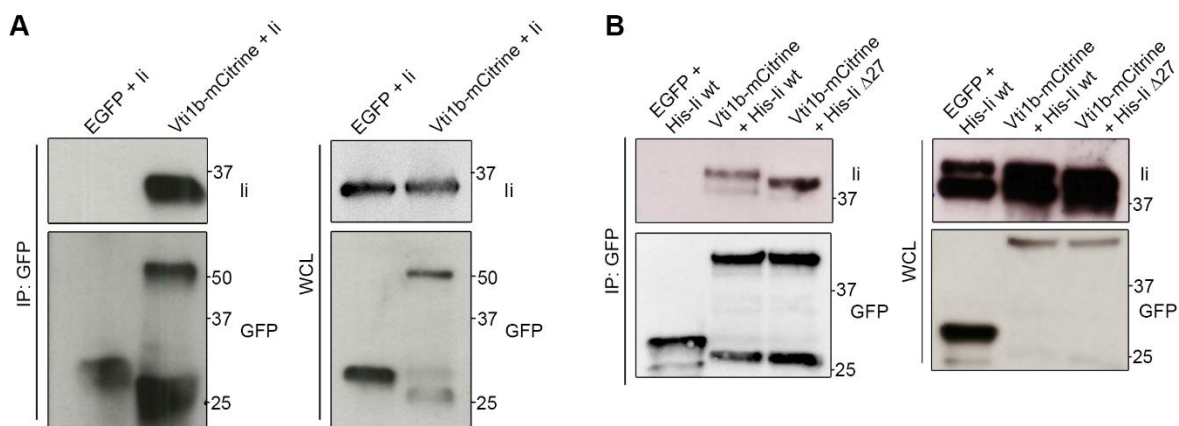

Figure 5

824

825 **Figure 5. Vti1b interacts with Ii.** A) M1-pMep4-Ii wt cells were transiently transfected with  
826 EGFP or Vti1b-mCitrine and Ii expression was induced by treatment with CdCl<sub>2</sub> overnight.  
827 Cells were lysed and co-IP with GFP-Trap magnetic beads. Whole-cell lysates (WCL, on the  
828 right) and immunoprecipitated (IP, on the left) were subjected to Western blot analysis. B)  
829 HeLa cells were transiently co-transfected with either EGFP or Vti1b-mCitrine and Ii wt or  
830 mutated as indicated in the figure. Cells were lysed after 24 hours of transfection and thereafter  
831 co-IP with GFP-Trap magnetic beads. Whole-cell lysates (WCL, on the right) and  
832 immunoprecipitates (IP, on the left) were subjected to Western blot analysis. GFP and Ii was  
833 visualized using the corresponding anti-GFP or anti-Ii antibodies.

834

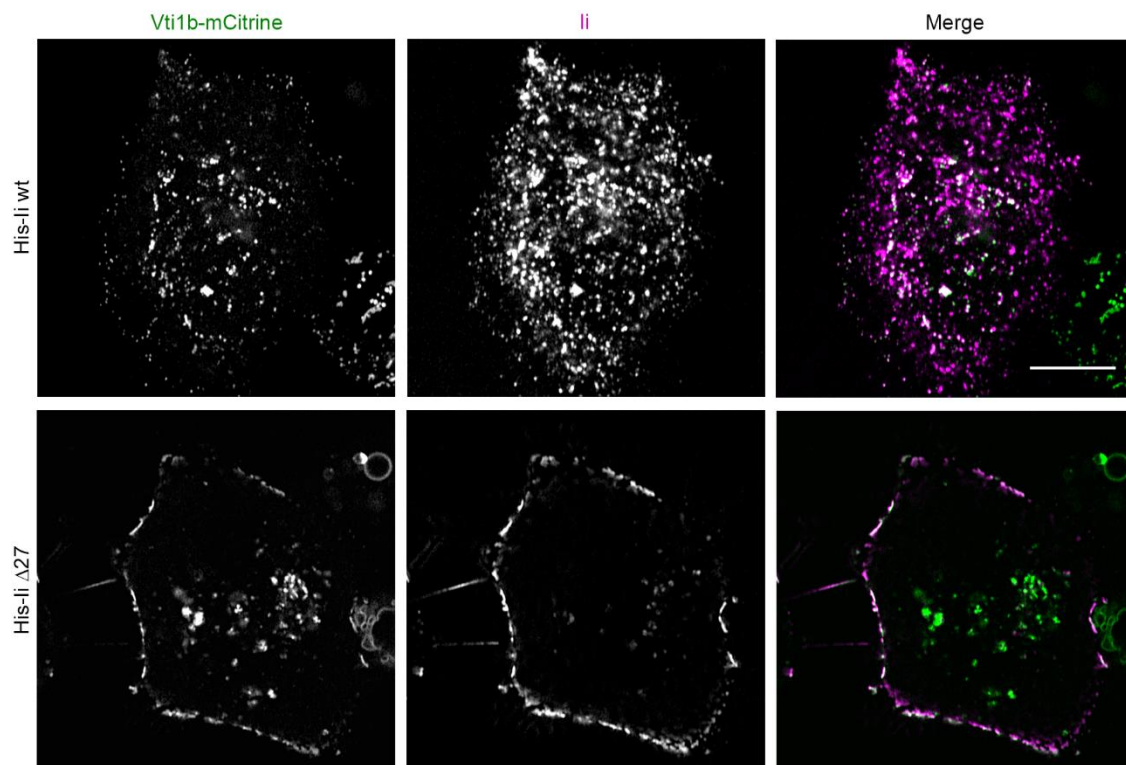

Figure 6

835

836 **Figure 6. Vti1b and Ii Δ27 colocalize at the plasma membrane.** HeLa cells were transfected  
837 with Vti1b-mCitrine and His-Ii (wt or Δ27) as indicated in the figure and then imaged. Confocal  
838 images are shown. Scale bar: 10 μm.

839

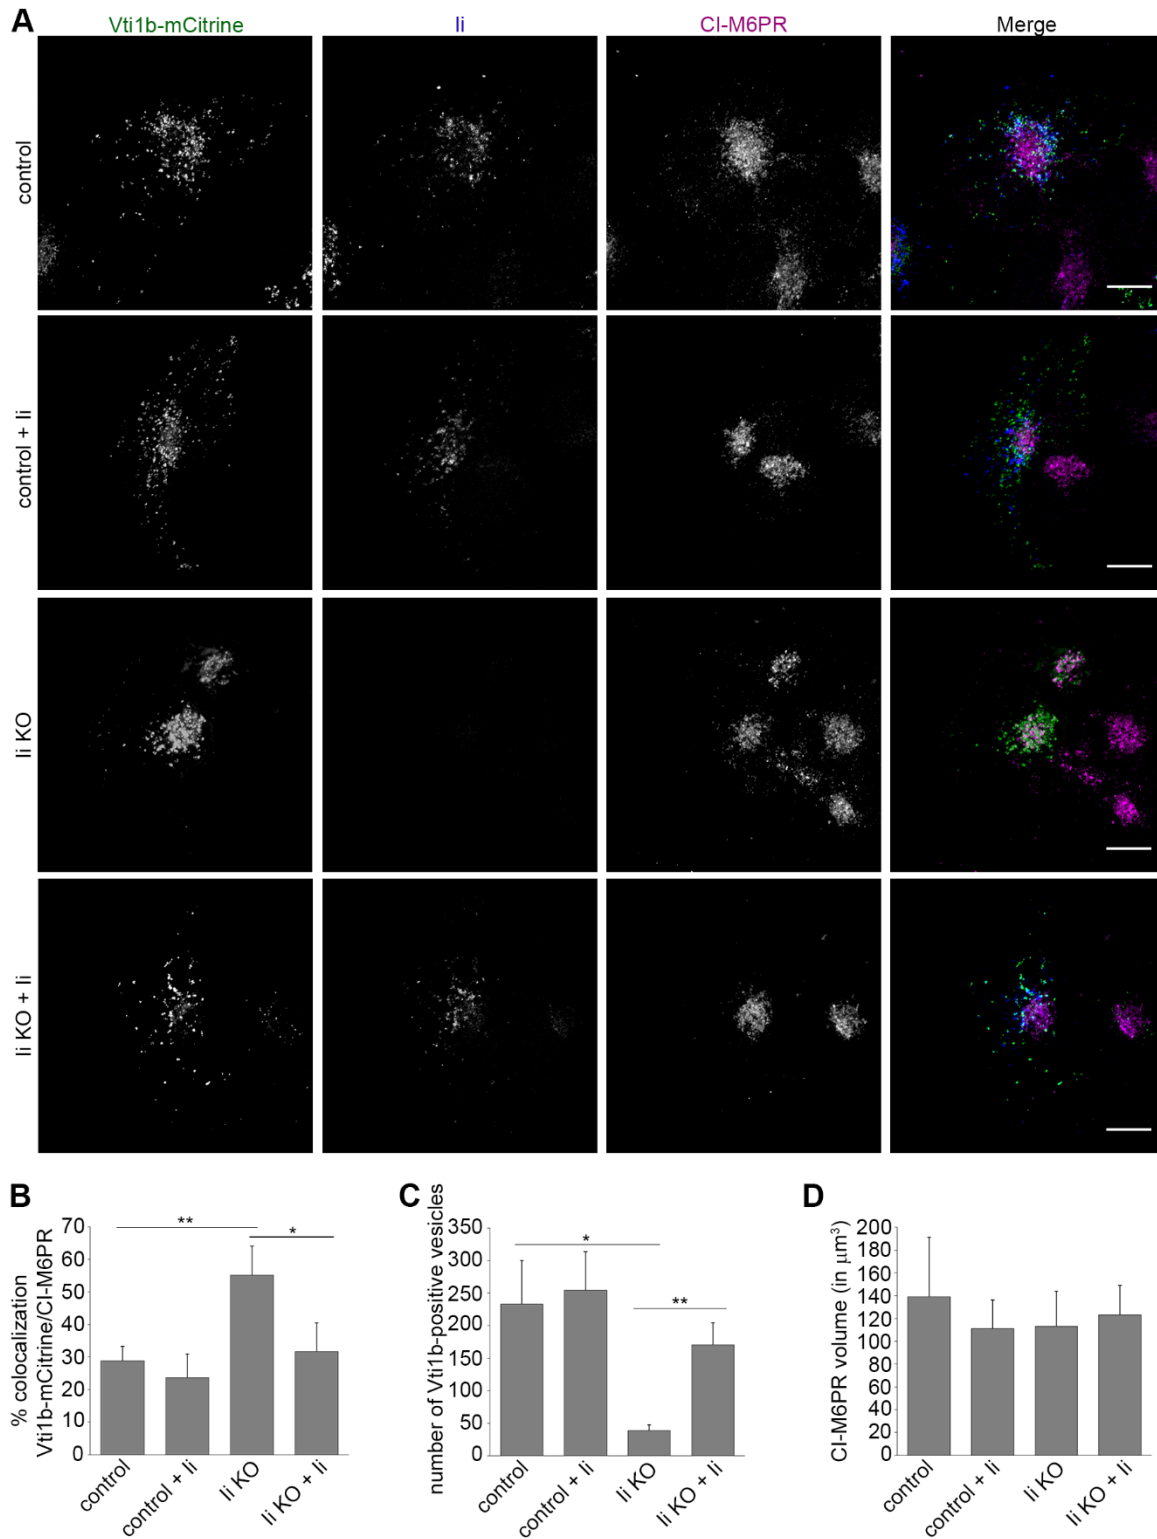

Figure 7

840

841 **Figure 7. Vti1b localization is altered in Meljuso Ii KO cells.** A) Meljuso control and Ii KO  
842 cells were transfected with either Vti1b-mCitrine alone or Vti1b-mCitrine and His-Ii as  
843 indicated in the figure and subsequently labelled live for Ii by treating the cells with an anti-Ii

844 antibody coupled with an Alexa Fluor 647 for 4 h. Cells were stained after fixation with an  
845 anti-CI-M6PR antibody. Representative images (maximal projections) of Vti1b-mCitrine  
846 (green), Ii (blue), CI-M6PR (magenta) and merge are shown. Scale bars: 10  $\mu$ m. B)  
847 Quantification of the percentage of colocalization between Vti1b-mCitrine and CI-M6PR in  
848 control, Ii-overexpressing, Ii KO or Ii-transfected Ii KO cells is shown. C) Quantification of  
849 the number of vesicles per cell positive for Vti1b-mCitrine in control, Ii-overexpressing, Ii KO  
850 or Ii-transfected Ii KO cells. D) Quantification of the volume of CI-M6PR positive structure in  
851 the indicated samples. Data represent the mean  $\pm$  SEM of at least three independent  
852 experiments.

853

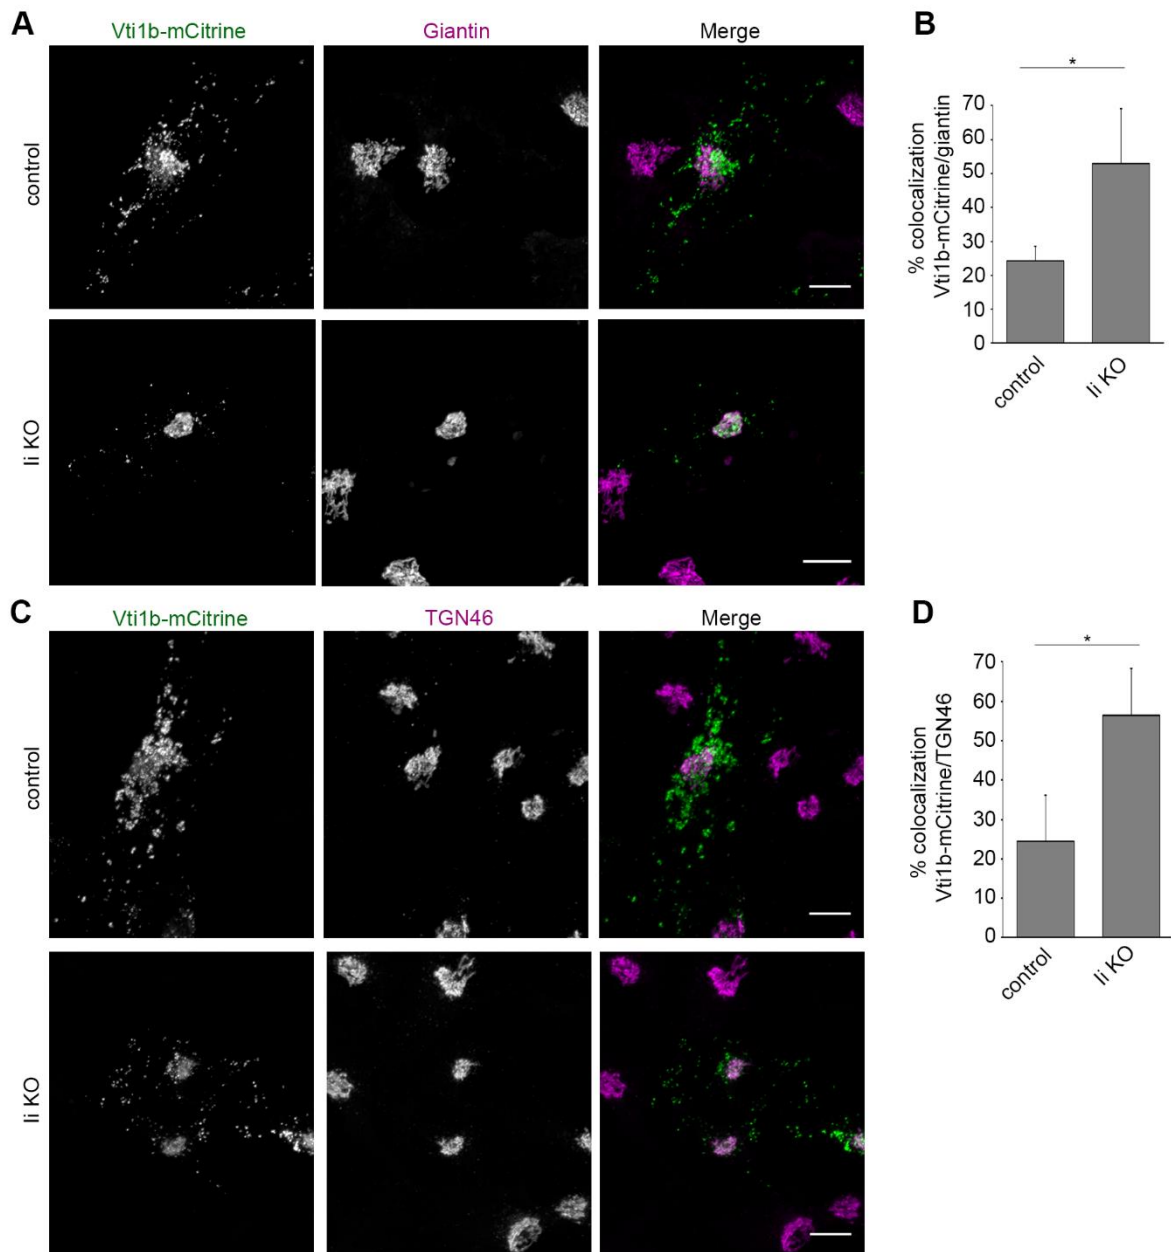

854

Figure 8

855 **Figure 8. Vti1b is more localized on giantin and TGN46 positive structures in Meljuso li**  
856 **KO cells.** A) Meljuso control and li KO cells were transfected with Vti1b-mCitrine and  
857 subsequently stained after fixation with an anti-giantin antibody. Representative images  
858 (maximal projections) of Vti1b-mCitrine (green), giantin (magenta) and merge are shown.  
859 Scale bars: 10  $\mu$ m. B) Quantification of the percentage of colocalization between Vti1b-  
860 mCitrine and giantin in control and li KO cells is shown. C) Meljuso control and li KO cells  
861 were transfected with Vti1b-mCitrine and subsequently stained after fixation and  
862 permeabilization with an anti-TGN46 antibody. Representative images (maximal projections)  
863 of Vti1b-mCitrine (green), TGN46 (magenta) and merge are shown. Scale bars: 10  $\mu$ m. B)

864 Quantification of the percentage of colocalization between Vti1b-mCitrine and TGN46 in  
865 control and Ii KO cells is shown.

866

867

868

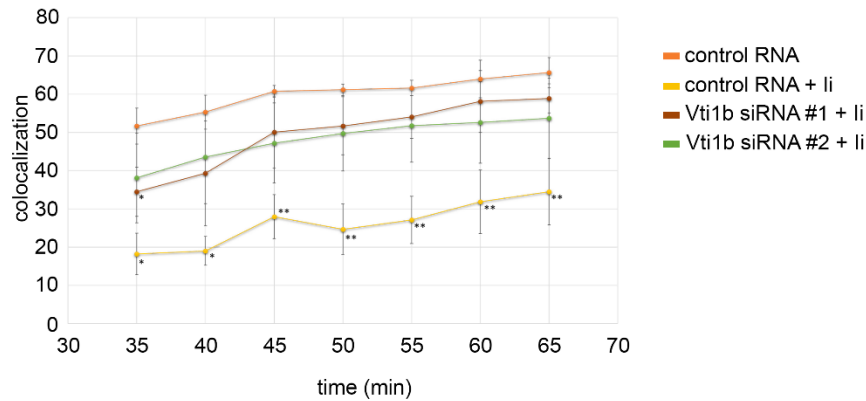

869

Figure 9

870 **Figure 9. Ii causes a delay in trafficking dependent on Vti1b.**

871 Colocalization of dextran and Lysotracker Deep Red in M1-pMep4-Ii cells expressing or not  
872 Ii and treated with control siRNA or siRNAs against VTI1B as indicated.

873

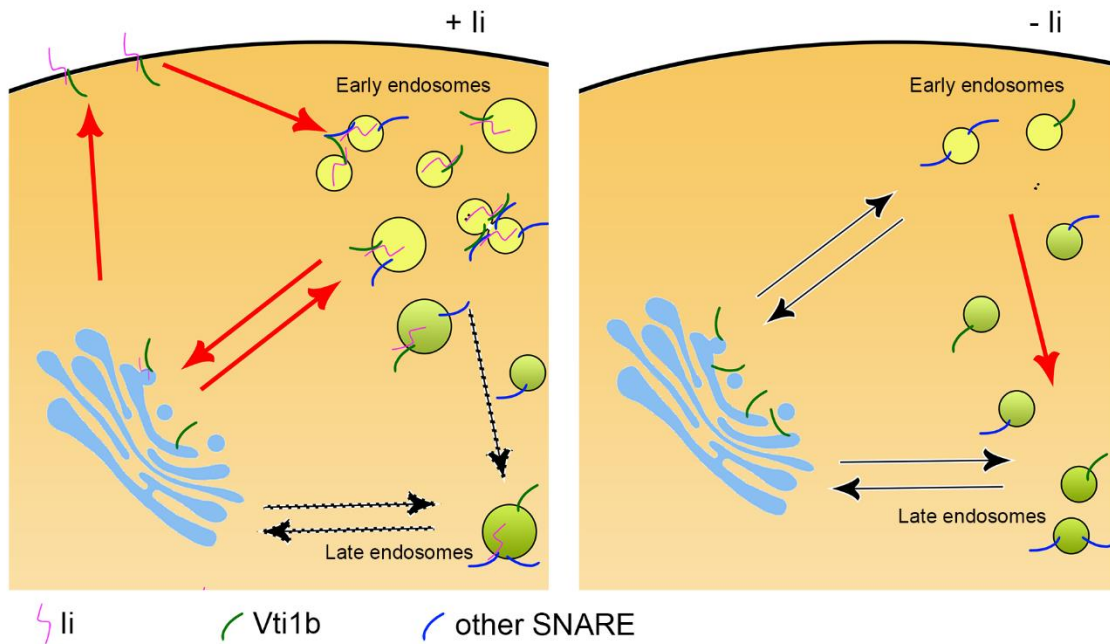

Figure 10

874

875 **Figure 10. Schematic model depicting the main findings of this study.** Ii binds to Vti1b and  
876 facilitates its trafficking via the Golgi apparatus to the plasma membrane and from there to  
877 early endosomes. There, Vti1b forms a SNARE complex leading to membrane fusion.  
878 Increased endosomal fusion dependent on Vti1b delays endosomal maturation (left). Lack of  
879 Ii induces a reduction of the endosomal localization of Vti1b, less endosomal fusion and faster  
880 endosomal maturation (right).
